# Supplementary material for: Circular RNA ITCH Is a Tumor Suppressor in Clear Cell Renal Cell Carcinoma Metastasis through miR-106b-5p/PDCD4 Axis
Source: Hindawi journal article supplement (doi:10.1155/2021/5524344), 2021-04-20
Supplement: f1 [file 5524344.f1.pdf]

Table S1. Clinical characteristics of 44 ccRCC patients

| <b>Variables</b>       |                                     |      |
|------------------------|-------------------------------------|------|
| <b>Gender</b>          |                                     |      |
|                        | Male                                | n=28 |
|                        | Female                              | n=16 |
| <b>Age (years)</b>     |                                     |      |
|                        | <60                                 | n=30 |
|                        | ≥60                                 | n=14 |
| <b>Tumor size (cm)</b> |                                     |      |
|                        | <4                                  | n=17 |
|                        | ≥4                                  | n=27 |
| <b>Grade</b>           |                                     |      |
|                        | Well differentiated (grade 1 and 2) | n=18 |
|                        | Moderately differentiated (grade 3) | n=18 |
|                        | Poorly differentiated (grade 4)     | n=8  |
| <b>Metastasis</b>      |                                     |      |
|                        | Yes                                 | n=33 |
|                        | No                                  | n=11 |
